# Supplementary material for: A facile post-modification strategy for carboxylic acid-functionalized UV-responsive pressure-sensitive adhesives
Source: Royal Society of Chemistry journal article supplement (doi:10.1039/d1py01216a), 2021-12-07
Supplement: d1py01216a1.pdf [file d1py01216a1.pdf]

## Supporting Information

# **A facile post-modification strategy for carboxylic acid-functionalized UV-responsive pressure-sensitive adhesives.**

*Chiwon Hwang,<sup>a,b</sup> Jong-Ho Back,<sup>a</sup> Dowon Ahn,<sup>a</sup> Hyun-Jong Paik,<sup>b</sup> Wonjoo Lee\*<sup>a</sup> and Youngchang  
Yu\*<sup>a</sup>*

*<sup>a</sup> Center for Advanced Specialty Chemicals, Korea Research Instituted of Chemical Technology, Ulsan  
44412, Republic of Korea.*

*<sup>b</sup> Department of Polymer Science and Engineering, Pusan National University, Busan 46241, Republic of  
Korea.*

### Table of Contents

|                                                     |                |
|-----------------------------------------------------|----------------|
| <b>Additional Synthetic Details</b>                 | <b>S2</b>      |
| <b>NMR study</b>                                    | <b>S3-S7</b>   |
| <b>FT-IR study</b>                                  | <b>S8</b>      |
| <b>SEC Data</b>                                     | <b>S9</b>      |
| <b>Differential Scanning Calorimetry Data</b>       | <b>S10-S12</b> |
| <b>Rationalization of unintended gelation</b>       | <b>S13</b>     |
| <b>Proof of disappearance of C=C by FT-IR study</b> | <b>S14</b>     |
| <b>Single lap shear strength test</b>               | <b>S15</b>     |
| <b>References</b>                                   | <b>S16</b>     |

## Additional Synthetic Details

**4-styrenesulfonyl-2-methylaziridine. (StMAz)<sup>1</sup>** A 250 mL round bottom flask was charged with sodium 4-vinylbenzenesulfonate (12.5 g, 60.62 mmol), THF (50 mL) and a stir bar. To the resulting solution was added oxalyl chloride (8.2 g, 64.61 mmol) and 2 mL of DMF dropwise at 0 °C. After stirring reaction mixture at 25 °C for 5 h, precipitated NaCl salt was filter and yellowish filtrate which containing **4-styrenesulfonyl chloride** was directly used without further purification to next step. A 250 mL round bottom flask was charged with 2-methylaziridine (3.17 g, 54.56 mmol), trimethylamine (8.28 g, 81.84 mmol), THF (50 mL) and a stir bar. A mixture was stirred to -20 °C, and aforementioned filtrate was added dropwise for about an hour. The reaction was allowed to room temperature and stirred 2 hours. 20 mL of saturated sodium bicarbonate solution was added and the mixture was extracted by washing with 200 mL of THF and 100 mL of water 3 times in the presence of brine solution. Collected organic layer was dried over anhydrous MgSO<sub>4</sub> and then concentrated under reduced pressure to afford the desired product as white solid (6.9 g, 64% over 2 steps). <sup>1</sup>H NMR (300 MHz, 298 K, CDCl<sub>3</sub>): δ 7.87 (d, 2H), 7.53 (d, 2H), 6.73 (dd, 1H), 5.88 (d, 1H), 5.42 (d, 1H), 2.82 (m, 1H), 2.60 (d, 1H), 2.02 (d, 1H), 1.23 (d, 3H).

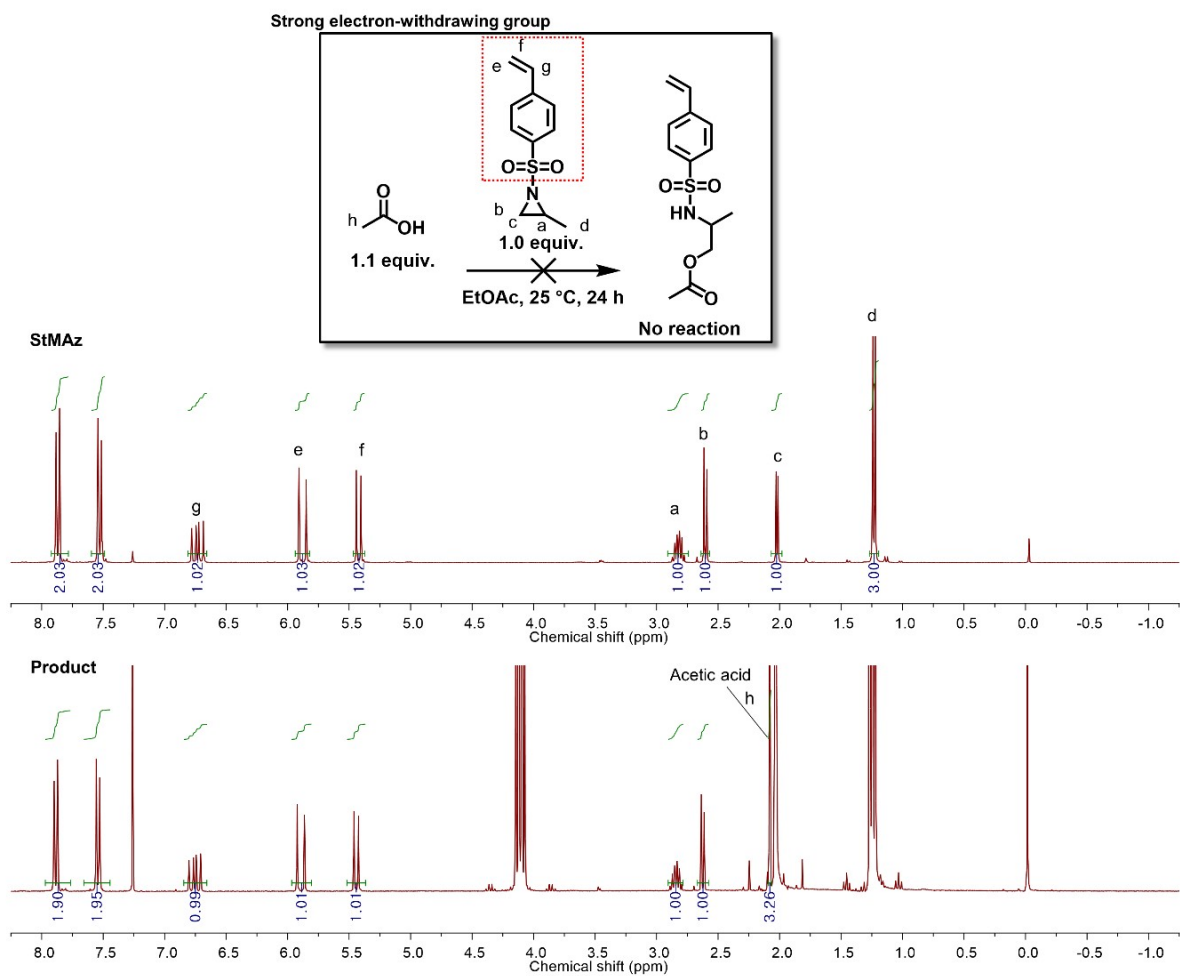

**Fig. S1**  $^1\text{H}$  NMR spectra of reaction between acetic acid and StMAz (4-styrenesulfonyl-2-methylaziridine) at 50 °C for 24 hours. (300 MHz, 298 K,  $\text{CDCl}_3$ )

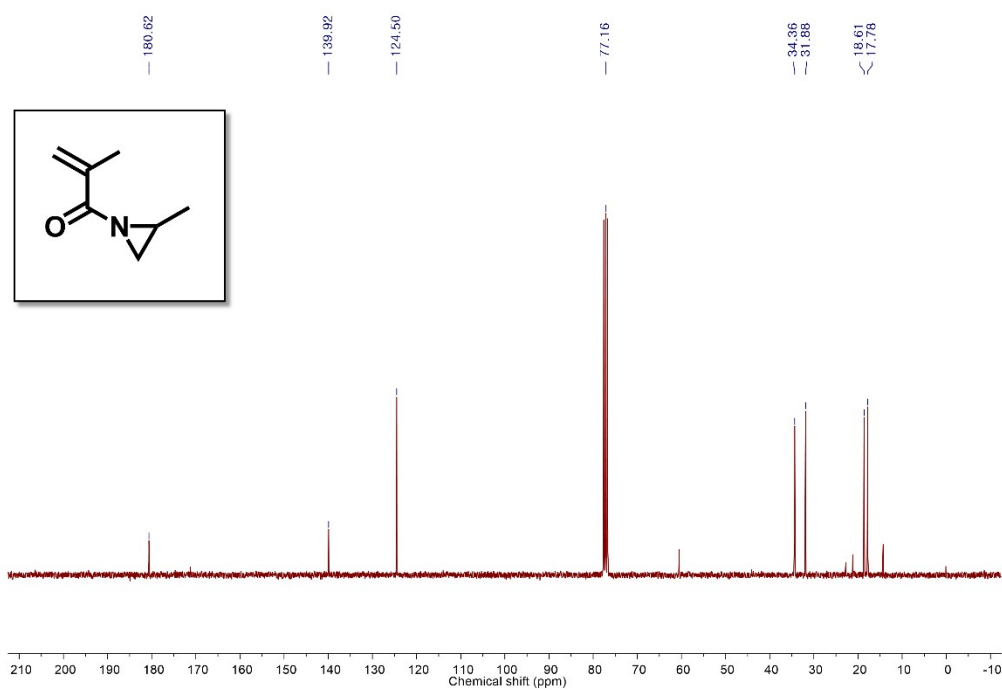

**Fig. S2**  $^{13}\text{C}$  NMR spectra *N*-methacryloyl-2-methylaziridine (75 MHz, 298 K,  $\text{CDCl}_3$ )

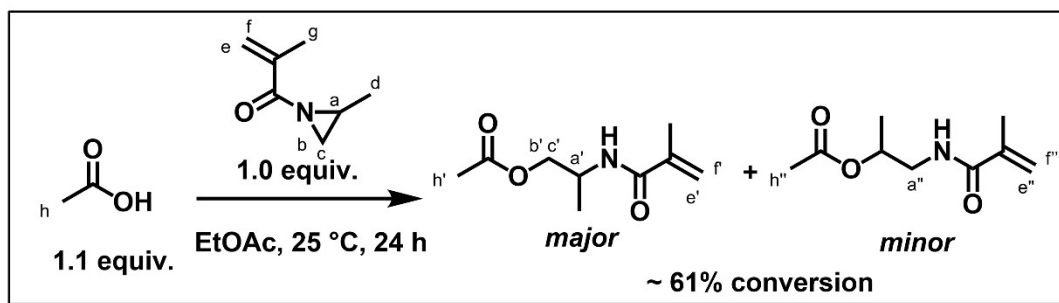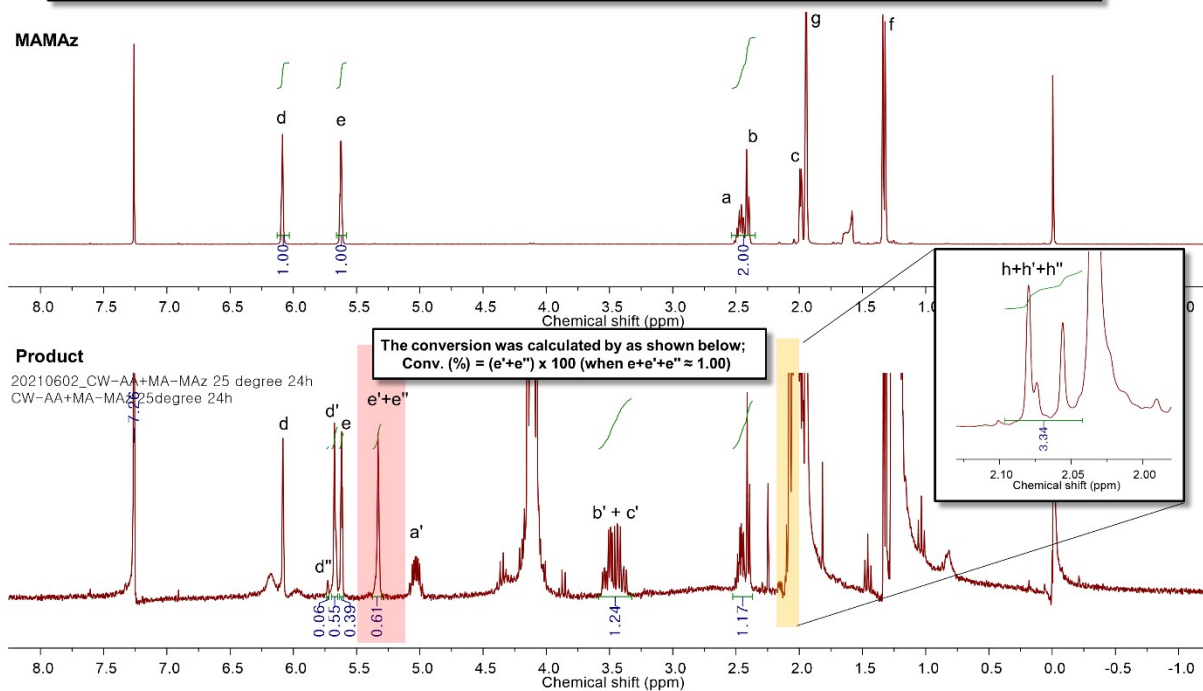

**Fig. S3**  $^1\text{H}$  NMR spectra of reaction between acetic acid and MAMAz at 25  $^\circ\text{C}$  for 24 hours. (300 MHz, 298 K,  $\text{CDCl}_3$ )

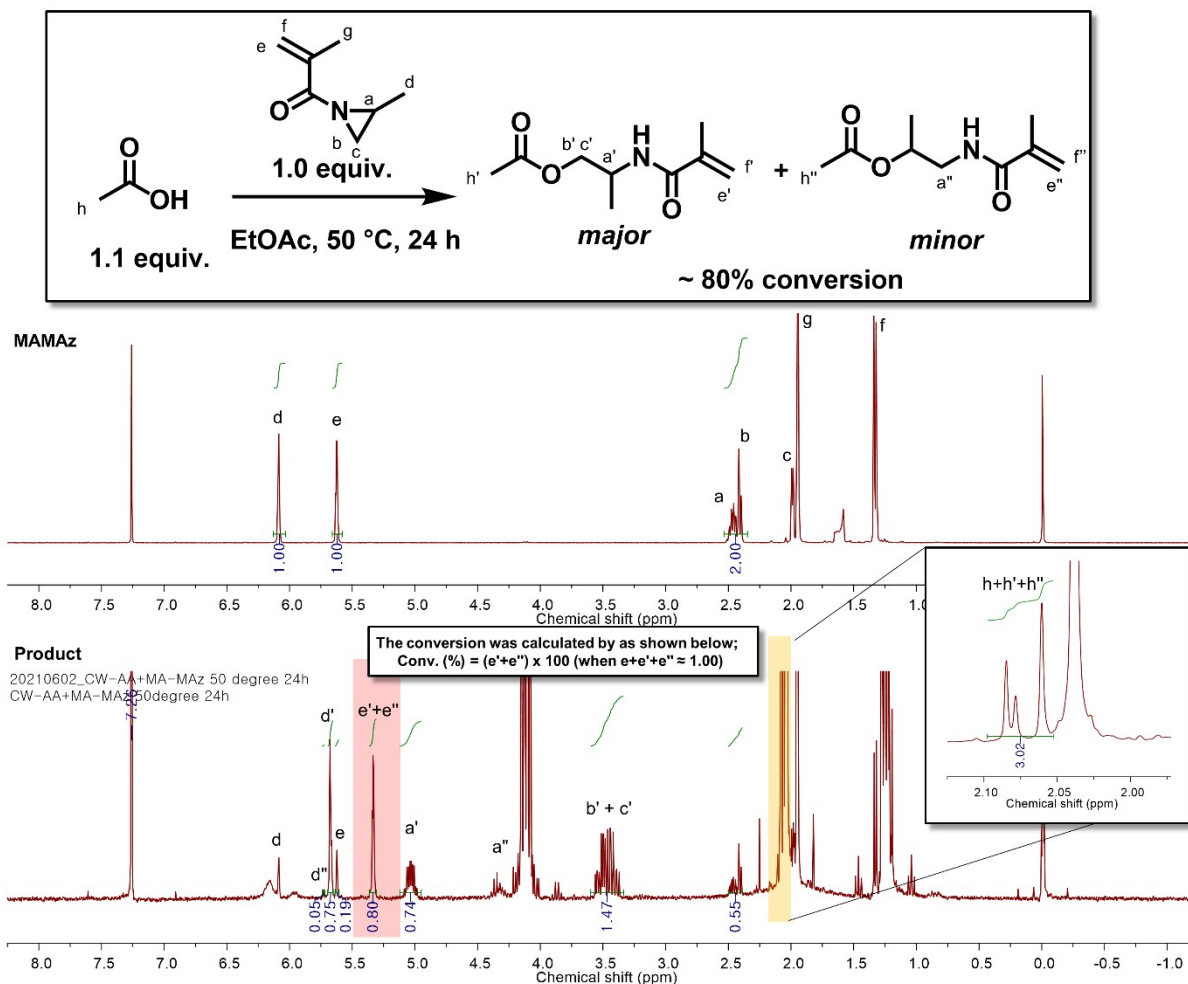

**Fig. S4**  $^1\text{H}$  NMR spectra of reaction between acetic acid and MAMAz at 50 °C for 24 hours. (300 MHz, 298 K,  $\text{CDCl}_3$ )

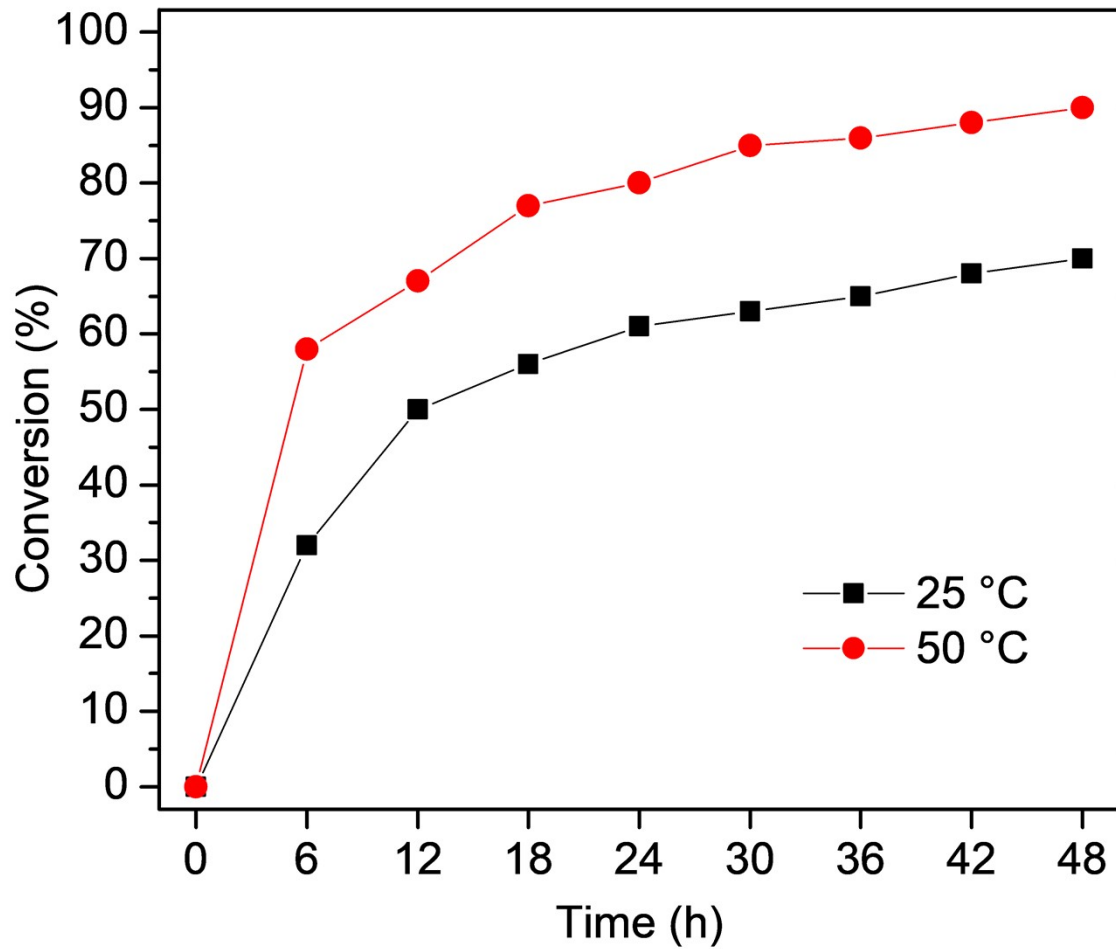

**Fig. S5** Reaction kinetics under the modeling test of acetic acid with MAMAz. Conversion was determined by  $^1\text{H}$  NMR.

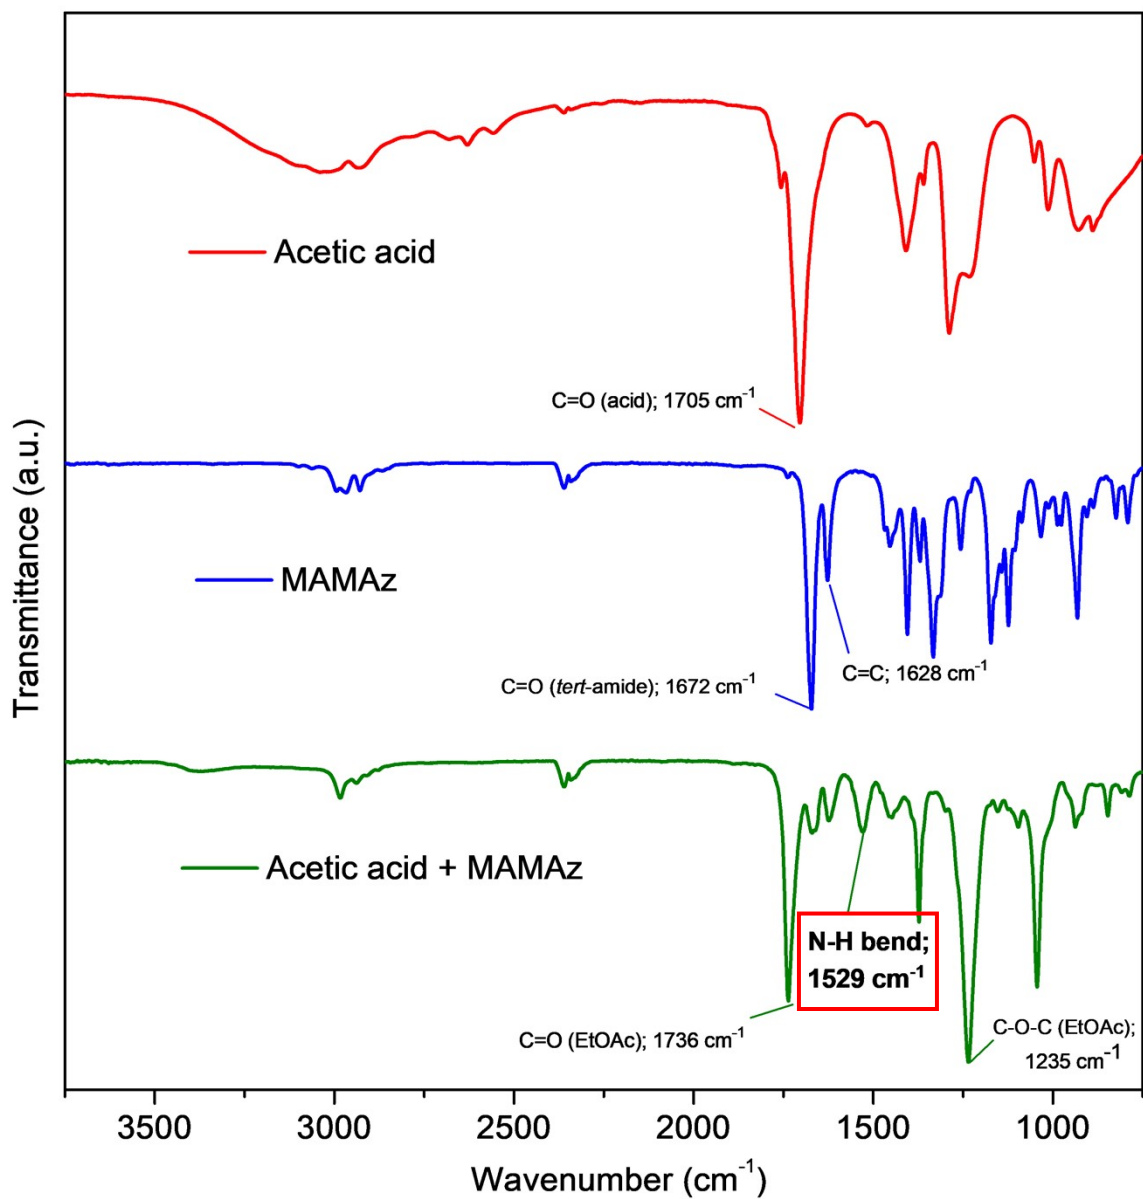

Fig. S6 Integrated IR spectra of reaction between acetic acid and MAMAz at 25 °C for 24 hours.



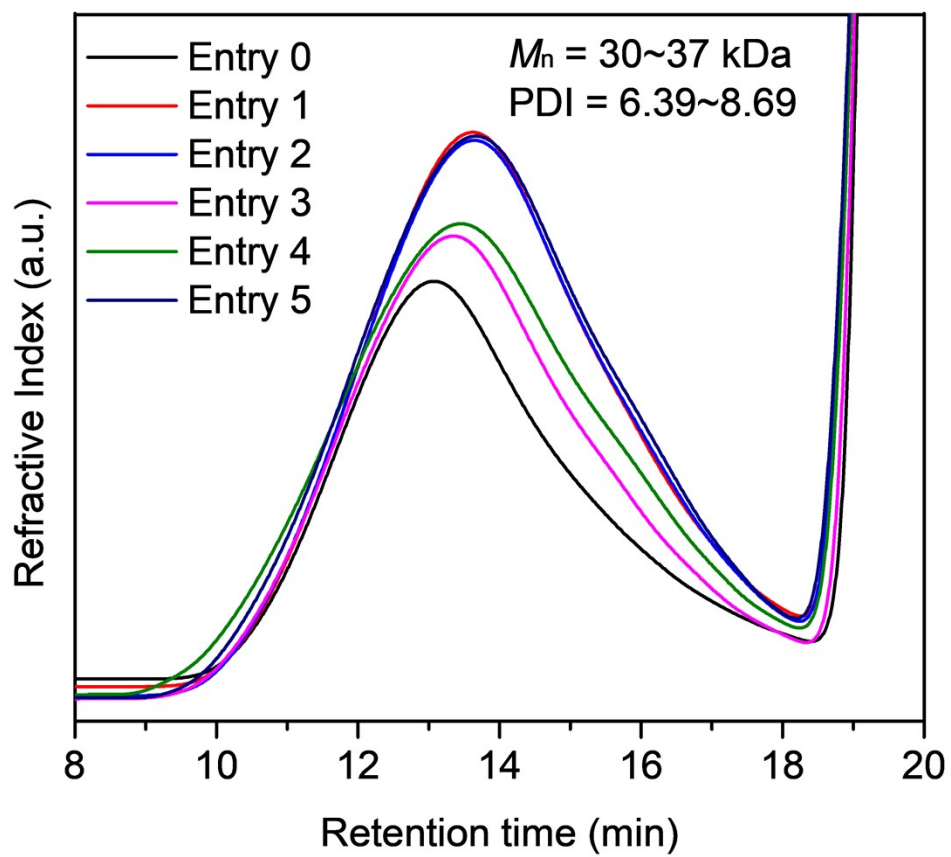

**Fig. S7** SEC data recorded for various PSAs (0, 10, 20, 30, 40 and 50 mol % of -COOH substituted; 6 samples)

Sample: 20210506\_CW-PSA seed re1  
Size: 19.7000 mg

DSC

File: C:\...20210506\_CW-PSA seed re1.001

Run Date: 2021-05-06 20:10  
Instrument: DSC Q2000 V24.10 Build 122

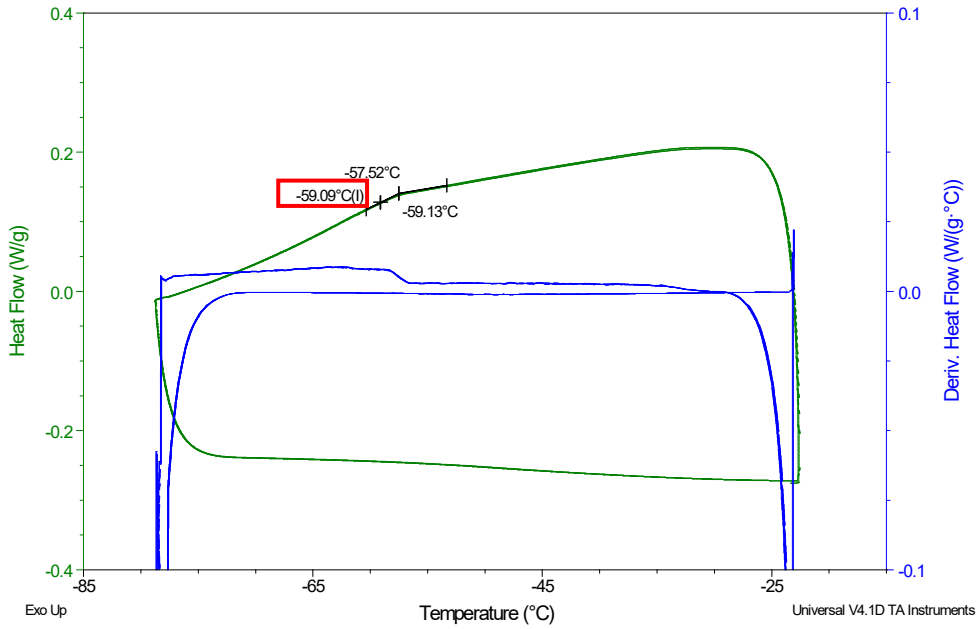

Fig. S8 DSC data recorded for Entry 0 (Original PSA)

Sample: 20210506\_CW-PSA+MA-MAz 10%  
Size: 18.3000 mg

DSC

File: C:\...20210506\_CW-PSA+MA-MAz 10%.001

Run Date: 2021-05-06 20:57  
Instrument: DSC Q2000 V24.10 Build 122

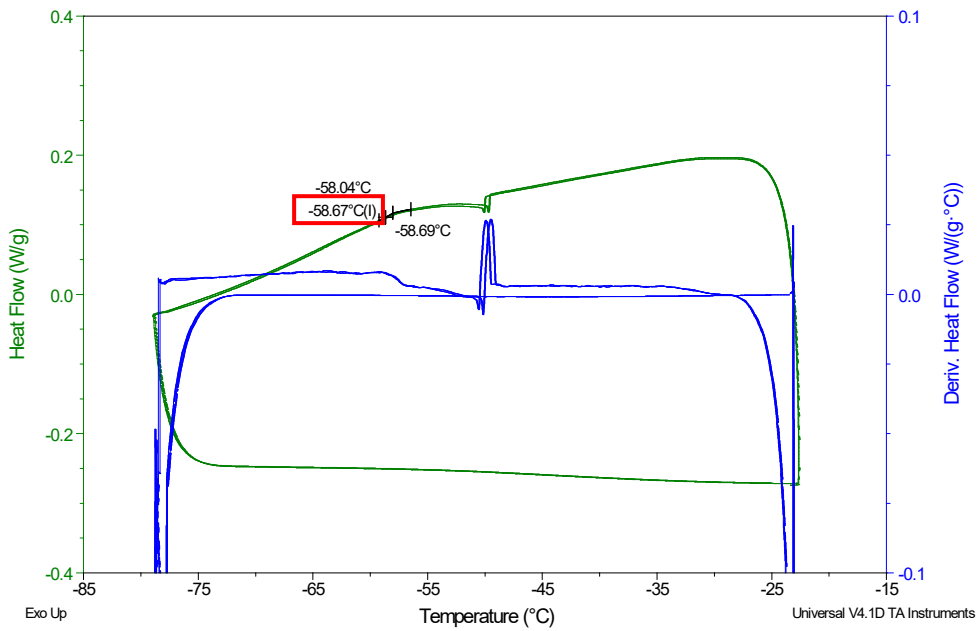

Fig. S9 DSC data recorded for Entry 1 (10 mol % -COOH substituted)

Sample: 20210506\_CW-PSA+MA-MAz 20%  
Size: 14.7000 mg

DSC

File: C:\...20210506\_CW-PSA+MA-MAz 20%.001

Run Date: 2021-05-06 21:44

Instrument: DSC Q2000 V24.10 Build 122

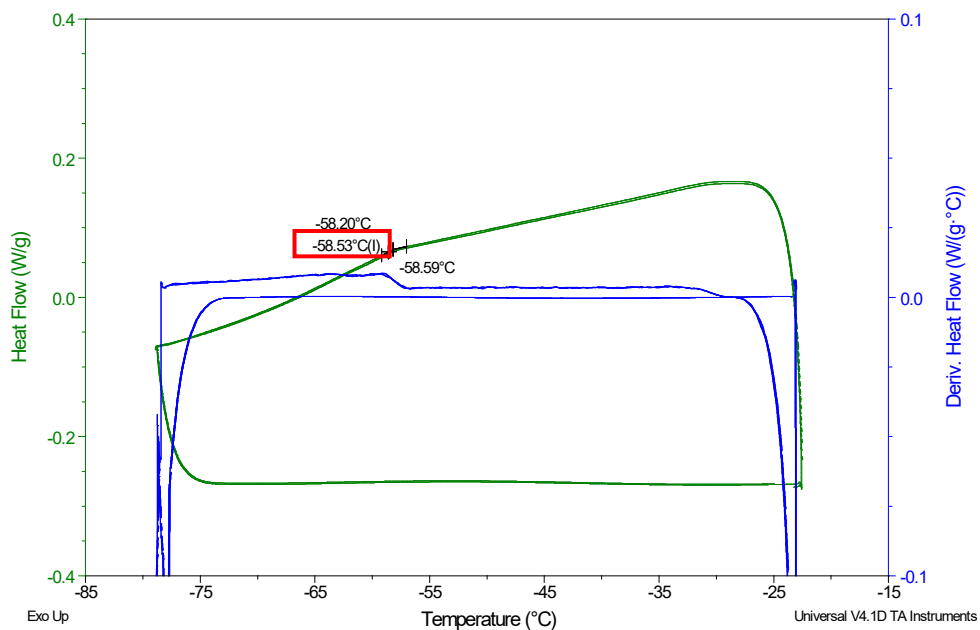

**Fig. S10** DSC data recorded for Entry 2 (20 mol % -COOH substituted)

Sample: 20210506\_CW-PSA+MA-MAz 30%  
Size: 16.5000 mg

DSC

File: C:\...20210506\_CW-PSA+MA-MAz 30%.001

Run Date: 2021-05-06 22:31

Instrument: DSC Q2000 V24.10 Build 122

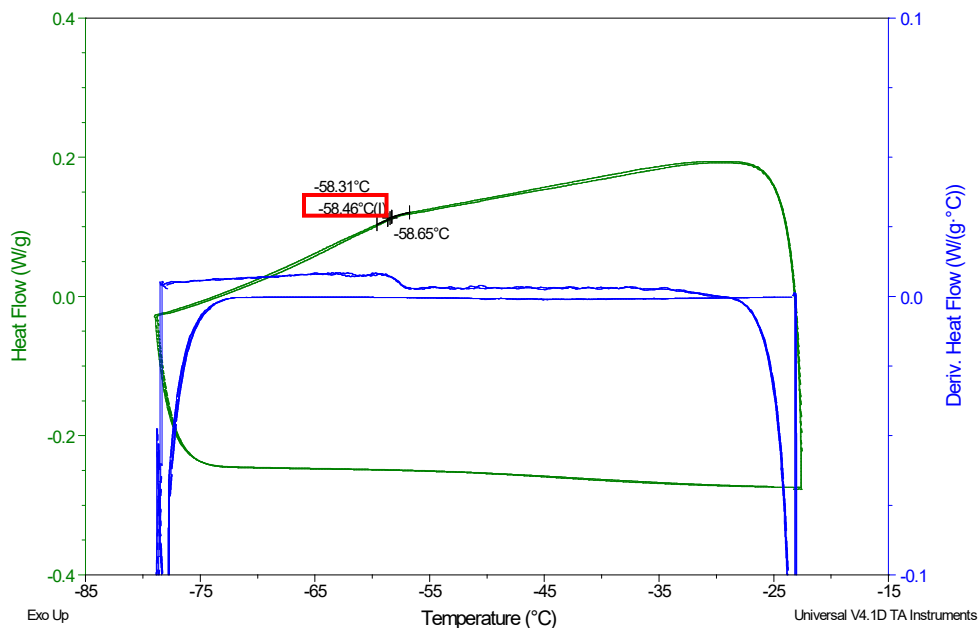

**Fig. S11** DSC data recorded for Entry 3 (30 mol % -COOH substituted)

Sample: 20210506\_CW-PSA+MA-MAz 40%  
Size: 14.5000 mg

DSC

File: C:\...20210506\_CW-PSA+MA-MAz 40%.001

Run Date: 2021-05-06 23:18

Instrument: DSC Q2000 V24.10 Build 122

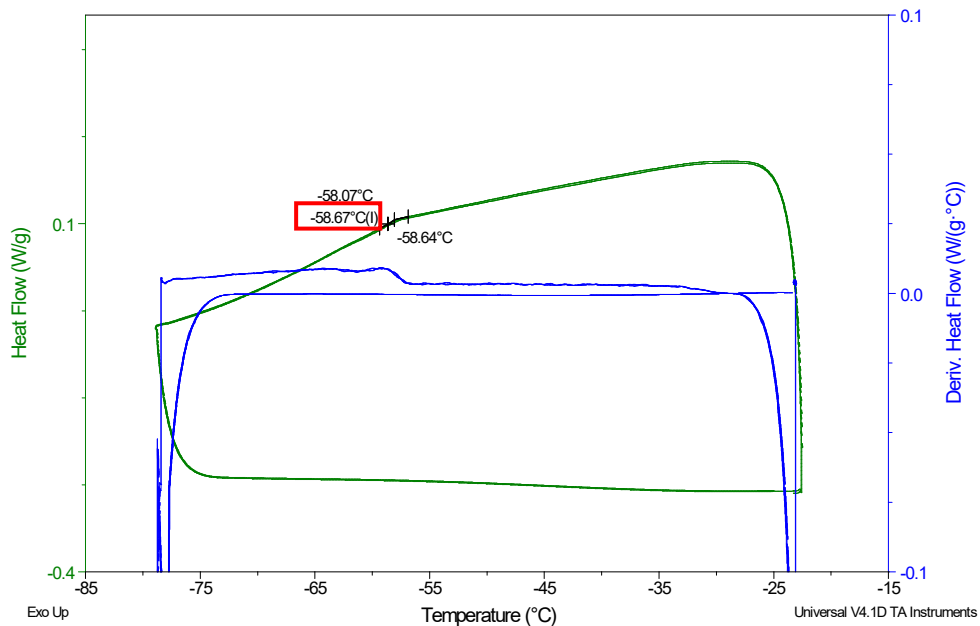

Fig. S12 DSC data recorded for Entry 4 (40 mol % -COOH substituted)

Sample: 20210506\_CW-PSA+MA-MAz 50%  
Size: 15.4000 mg

DSC

File: C:\...20210506\_CW-PSA+MA-MAz 50%.001

Run Date: 2021-05-07 00:05

Instrument: DSC Q2000 V24.10 Build 122

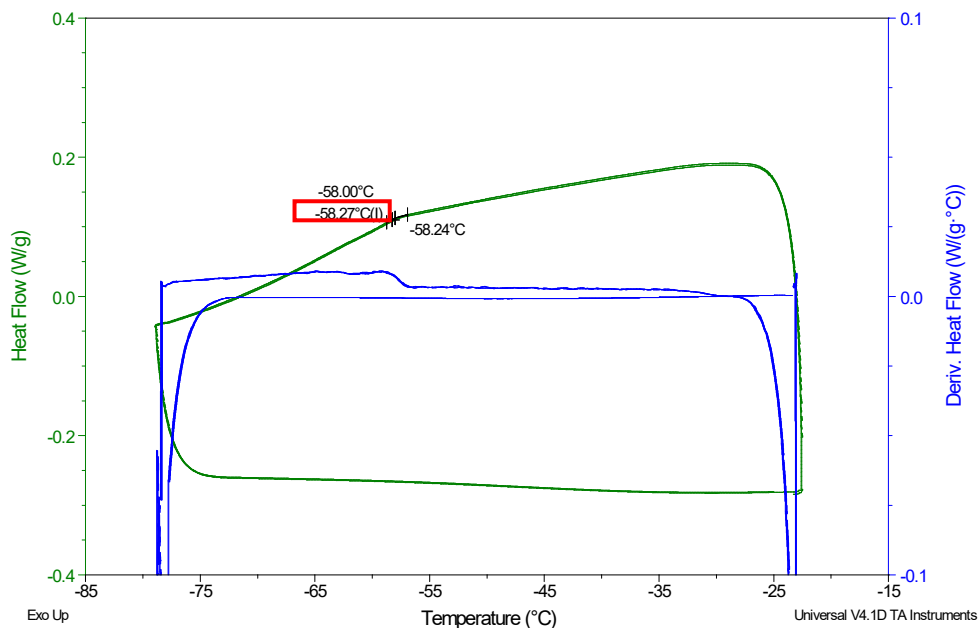

Fig. S13 DSC data recorded for Entry 5 (50 mol % -COOH substituted)

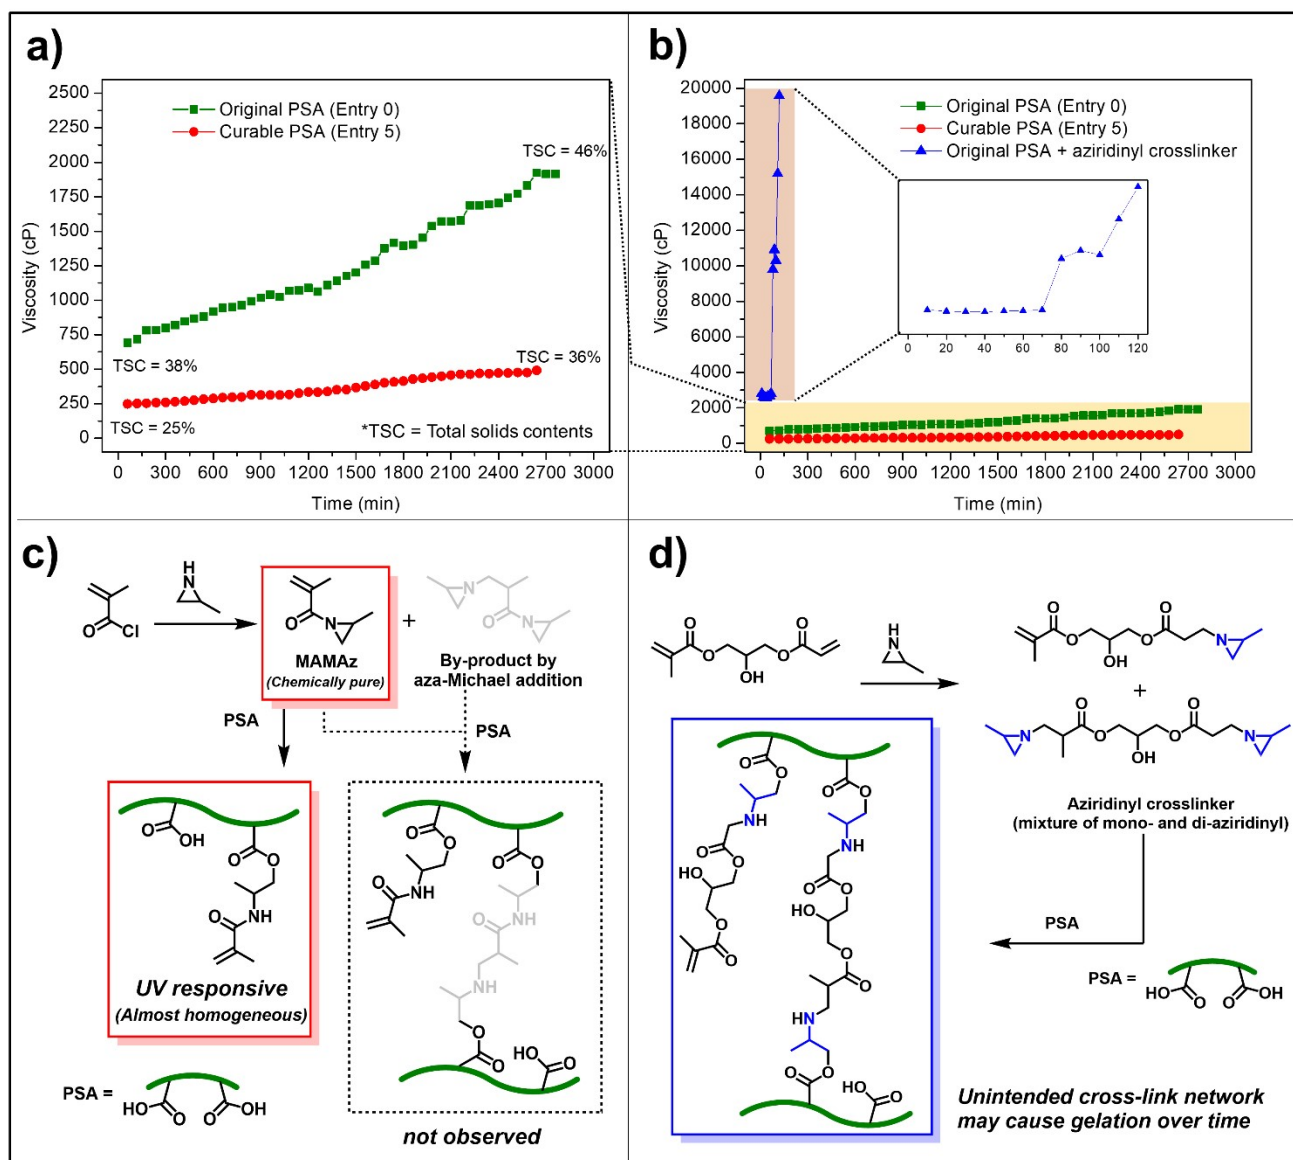

**Fig. S14** Real-time viscometer data of **a)** original PSA (Entry 0, green line-dot) and curable PSA (Entry 5; 50 mol % of -COOH substituted, red line-dot) **b)** mixture of original PSA with aziridiny cross-linker (blue line-dot) which appeared sharp increase of viscosity through unintended gelation. These occurrences were supported by rationalization to ensure pot-life by **c)** proposed mechanism in the presence of MAMAz and **d)** proposed mechanism in the presence of aziridiny cross-linker.

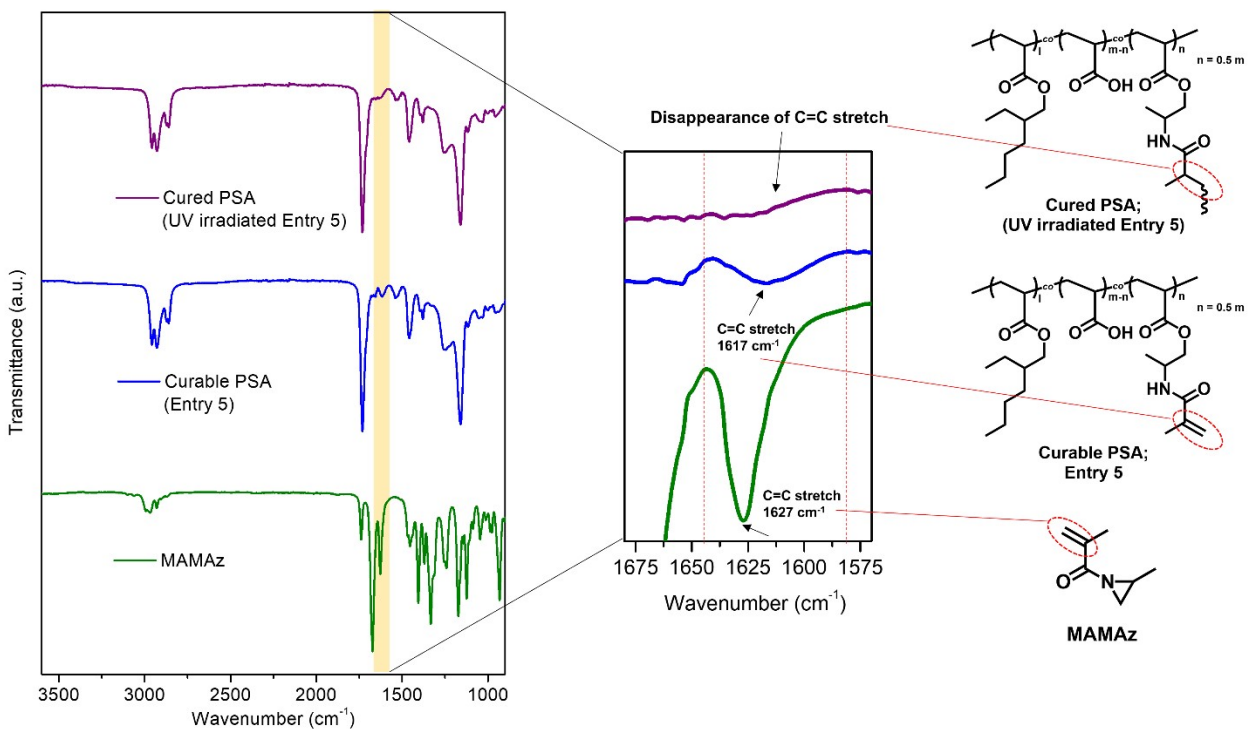

**Fig. S15** Integrated FT-IR spectra of MAMAz (bottom), curable PSA (entry 5; 50% of -COOH substituted, middle) and cured irradiated PSA (UV irradiated entry 5, top).

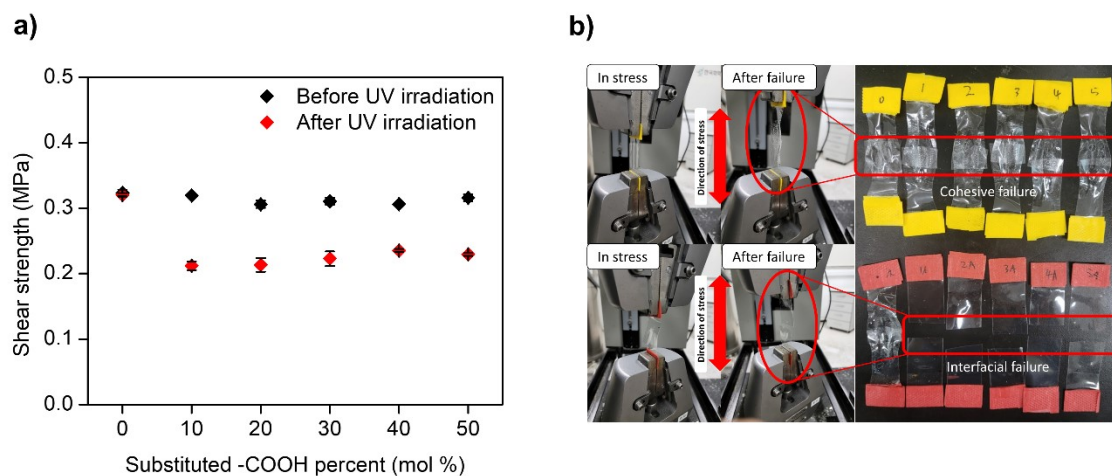

**Fig. S16** a) Single lap shear strength test of UV-responsive curable PSAs (entry 0~5; independent 6 samples); b) Images of failure fracture occurrence after shear stress; yellow and red tape-stringed samples represent the PSAs samples as UV irradiation before and after respectively.

## References

- 1) T. Gleede, E. Rieger, T. Homann-Mueller and F. Wurm, *Macromol. Chem. Phys.*, 2018, 219, 1700145.
